## RESEARCH ARTICLE

# Electric organ discharge diversity in the genus *Gymnotus*: anatomo-functional groups and electrogenic mechanisms

A. Rodríguez-Cattáneo<sup>1</sup>, P. Aguilera<sup>1</sup>, E. Cilleruelo<sup>1</sup>, W. G. R. Crampton<sup>2</sup> and A. A. Caputi<sup>1,\*</sup>

<sup>1</sup>Departamento de Neurociencias Integrativas y Computacionales, Instituto de Investigaciones Biológicas Clemente Estable, Av. Italia 3318, Montevideo, Uruguay and <sup>2</sup>Department of Biology, University of Central Florida, 4000 Central Florida Boulevard, Orlando, FL 32816, USA

\*Author for correspondence (angel@iibce.edu.uy)

### SUMMARY

Previous studies describe six factors accounting for interspecific diversity of electric organ discharge (EOD) waveforms in *Gymnotus*. At the cellular level, three factors determine the locally generated waveforms: (1) electrocyte geometry and channel repertoire; (2) the localization of synaptic contacts on electrocyte surfaces; and (3) electric activity of electromotor axons preceding the discharge of electrocytes. At the organismic level, three factors determine the integration of the EOD as a behavioral unit: (4) the distribution of different types of electrocytes and specialized passive tissue forming the electric organ (EO); (5) the neural mechanisms of electrocyte discharge coordination; and (6) post-effector mechanisms. Here, we reconfirm the importance of the first five of these factors based on comparative studies of a wider diversity of *Gymnotus* than previously investigated. Additionally, we report a hitherto unseen aspect of EOD diversity in *Gymnotus*. The central region of the EO (which has the largest weight on the conspecific-received field) usually exhibits a negative–positive–negative pattern where the delay between the early negative and positive peaks (determined by neural coordination mechanisms) matches the delay between the positive and late negative peaks (determined by electrocyte responsiveness). Because delays between peaks typically determine the peak power frequency, this matching implies a co-evolution of neural and myogenic coordination mechanisms in determining the spectral specificity of the intraspecific communication channel. Finally, we define four functional species groups based on EO/EOD structure. The first three exhibit a heterogeneous EO in which doubly innervated electrocytes are responsible for a main triphasic complex. Group I species exhibit a characteristic cephalic extension of the EO. Group II species exhibit an early positive component of putative neural origin, and strong EO auto-excitability. Group III species exhibit an early, slow, negative wave of abdominal origin, and variation in EO auto-excitability. Representatives of Group IV generate a unique waveform comprising a main positive peak followed by a small, load-dependent negative component.

Key words: fixed motor pattern, evolution, signal diversity, electrocyte, coordination, excitability.

Received 16 October 2012; Accepted 13 December 2012

### INTRODUCTION

The genus *Gymnotus* includes 37 species, distributed from Uruguay to as far north as southern Mexico (Crampton, 2011). These fishes, like other members of the order Gymnotiformes, exhibit the unusual ability to generate electric fields from a specialized electric organ (EO) controlled by the nervous system (Lissmann, 1958; Caputi et al., 2005; Caputi, 2011). The field generated by the electric organ discharge (EOD) is affected by the presence of nearby objects. Changes to the ongoing transcutaneous fields (electric images) are evaluated by an electrosensory array, allowing the fish to analyze the structure of nearby objects (Pereira and Caputi, 2010). In *Gymnotus*, the EOD field comprises a continuous train of pulses. Each pulse in the series is characterized by a stereotyped, species-specific waveform which serves as a communication signal (i.e. for mate attraction), in addition to its role as an electrolocation carrier (Black-Cleworth, 1970; Westby, 1974; McGregor and Westby, 1992; Crampton and Albert, 2006; Crampton et al., 2008; Crampton et al., 2011).

It has been proposed (Bennett and Grundfest, 1959; Bennett, 1971; Macadar, 1993; Caputi, 1994; Caputi, 1999; Caputi et al., 2005; Rodríguez-Cattáneo, 2009) that the structure and specificity of the

EOD field waveform in pulse fish depends on variation in six different factors. Three of these, occurring at the cellular level of organization, determine the locally generated waveforms: (1) the geometry and channel repertoire of myogenic electrocytes; (2) the localization of the synaptic contacts on electrocytes surface; and (3) the synchronous activity of a large bundle of electromotor axons preceding the discharge of electrocytes. The other three factors determine, at an organismal level, the integration of the EOD as a behavioral unit: (4) the distribution of different electrocyte types and specialized passive tissue forming the EO; (5) the neural mechanisms of coordination of electrocyte activity; and (6) the geometry and conductance of surrounding tissues. This last factor determines the post-effector mechanisms of current summation along the fish's body and is essential to understanding how the electromotive force (EMF) pattern is transformed into an electric field in water (Caputi and Budelli, 1995; Aguilera et al., 2001; Caputi and Budelli, 2006).

The influence of these six kinds of variation on EOD waveform has been well documented by a long series of studies involving cellular and integrative analysis of the EOD in the model species *Gymnotus omarorum* (Trujillo-Cenóz et al., 1984; Lorenzo et al., 1988; Lorenzo et al., 1990; Lorenzo et al., 1993; Trujillo-Cenóz and Echagüe, 1989;

Macadar et al., 1989; Caputi and Trujillo-Cenóz, 1994; Caputi and Budelli, 1995; Sierra et al., 1995; Sierra et al., 2005; Caputi et al., 1989; Caputi et al., 1993; Caputi and Aguilera, 1996; Castelló et al., 2000; Aguilera et al., 2001; Rodríguez-Cattáneo and Caputi, 2009). Comparative studies of other species have allowed us to describe an additional type of EO organization that influences the EOD field and its waveform. In *Gymnotus coropinae* (Rodríguez-Cattáneo et al., 2008; Castelló et al., 2009) we observed a unique pattern comprising a rostral extension of the hypaxial EO below the cleithrum aponeuroses. In this region of the EO, the electrocytes are large, few in number, and may be distinguished by their characteristic shape and innervation patterns (Castelló et al., 2009). In another study of an as-yet-undescribed species (*G. n. sp. 'itu'*), we showed that the EO auto-excitability suffices to explain the difference in waveform between two species whose EO and EOD are similar, except for late wave components resulting from the propagation of the action potential through the electrocyte membrane (Rodríguez-Cattáneo and Caputi, 2009). Finally, in specimens of *G. carapo* from Suriname (*G. carapo* SU), we observed that the early positive component (which occurs only 1.5 ms after the pacemaker discharge at ~200 mm caudal to the pacemaker location) is too early to be generated by myogenic mechanisms. This component is instead more likely the result of synchronized activity of the posterior electromotor nerve (Rodríguez-Cattáneo et al., 2008).

In this paper we test the hypothesis that signal diversity in *Gymnotus* may be explained by variation in the anatomo-functional features described above, and evaluate the role of the first five of the six factors previously recognized as determinants of interspecific waveform variation. Combining data from the seven species reported here with the four species studied earlier, we have now compiled electrophysiological and anatomical surveys for 11 species – including representatives of two (G1 clade and *G. carapo* clade) of the three major lineages of *Gymnotus* [G1 clade, G2 clade and *G. carapo* clade (*sensu* Lovejoy et al., 2010)]. Besides obtaining data that confirm the first five factors listed above as important determinants of EOD diversity, our observations also indicate, for the first time, that the sharpness of the power spectra and the peak power frequency is determined by the co-evolution of neural coordination mechanisms and electrocyte responsiveness.

## MATERIALS AND METHODS

### Animals

Specimens of *G. n. sp. 'carapo PE'*, *G. curupira* and *G. javari* were collected from rainforest creeks in the vicinity of the Instituto de Investigaciones de la Amazonia Peruana at Jenaro Herrera, Loreto, Peru (04°54'S, 73°39'W) by W.G.R.C. Authorization for field collections was provided by the Ministerio de La Producción (Resolución Directorial no. 546-2009-PRODUCE/DGEPP, 22 July 2009, Lima, Perú). Specimens of *G. obscurus*, *G. tigre* and *G. varzea* were collected from floodplain habitats of the Rio Amazonas within 50 km of the city of Iquitos, Loreto, Peru (03°45'S, 73°15'W) by a local fish dealer. Specimens of *G. sylvius* were obtained from the Rio Paraná by local dealers in Esquina, Argentina.

All specimens were identified unambiguously to species by W.G.R.C. on the basis of external morphology, and by comparison to the primary types. Peruvian specimens reported here as *G. n. sp. 'carapo PE'* closely resembled those studied previously from Suriname [the region of the type locality for *G. carapo* (Albert and Crampton, 2003)] in both morphology and head-to-tail EOD (see Rodríguez-Cattáneo et al., 2008), but this species complex is the subject of ongoing taxonomic revision. For clarity we refer to *G. carapo* from Suriname as *G. carapo* SU.

We studied a total of 158 specimens: six *G. n. sp. 'carapo PE'* [70–247 mm total length (TL)], nine *G. curupira* (120–219 mm TL), 119 *G. javari* (85–240 mm TL), one *G. obscurus* (170 mm TL), 20 *G. sylvius* (196–420 mm TL), two *G. tigre* (230–260 mm TL) and one *G. varzea* (180 mm TL).

All experiments were either non-invasive or terminal. Protocols were approved by the Instituto de Investigaciones Biológicas Clemente Estable (Comisión de Bioética 001/03/2011) and the University of Central Florida Institutional Animal Care and Use Committee (protocol no. 06-33W). They also followed the guidelines of the Comisión Honoraria de Experimentación Animal (Universidad de la República, Uruguay), the Society for Neuroscience and the International Guiding Principles for Biomedical Research Involving Animals. Following recordings, fish were killed by an overdose of pentobarbital (2 mg, repeated if necessary up to apnea and EOD cessation) and fixed for taxonomic or anatomical analyses as described below.

### Evaluation of head-to-tail EODs

Far fields generated by the EODs [head-to-tail EOD-associated field (htEOD)] were recorded in water at standardized temperature (27±0.1°C) and conductivity (55±1 μS cm<sup>-1</sup>). Each fish was allowed 5 min to acclimate to the aquarium. The recording arena was 80 cm long by 40 cm wide, and filled to 36 cm depth. Individual fish were placed within a nylon-mesh sock supported by a mesh cradle suspended in mid-water (17 cm depth) and positioned equidistant from the tank ends and walls. Signals were captured using nickel chromium electrodes placed at the tank ends. The electrodes were connected to a wide-band (0.1 Hz to 30 kHz) AC-coupled differential amplifier (Signal Recovery 5113, AMETEK, Oak Ridge, TN, USA). htEODs were digitized using an NI-USB 6216 digitizer (National Instruments, Austin, TX, USA) at a sampling rate of 200 kHz and a resolution of 16 bits. Measurements of peak power frequency and signal duration were made using custom-written MATLAB and Java software designed by W.G.R.C. htEOD durations were calculated with the beginning and end of the htEOD taken at a 1% threshold of the amplitude of the normalized dominant positive phase. Spectral power densities were calculated from 65,536-point fast Fourier transform. htEOD amplitude was measured as mV cm<sup>-1</sup> at 10 cm at a standardized conductivity of 55 μS cm<sup>-1</sup> following the procedure described by Franchina and Stoddard (Franchina and Stoddard, 1998). Specimens retained for taxonomic analysis alone were fixed with 10% formalin for 3–14 days, preserved in 70% ethyl alcohol and deposited as voucher specimens at the Museo de Historia Natural de la Universidad Nacional Mayor de San Marcos, Lima, Peru, and at the University of Florida, Gainesville, FL, USA.

### Detailed spatial analysis of the EOD

For four *G. n. sp. 'carapo PE'*, six *G. curupira*, eight *G. javari*, one *G. obscurus*, 20 *G. sylvius*, two *G. tigre* and one *G. varzea*, the single air gap procedure was utilized to characterize the net head-to-tail EMF of the EOD, and the multiple air gap procedure was utilized to characterize the detailed spatio-temporal patterns of the equivalent EMF.

The single air gap procedure consists of the simultaneous recording of the current and voltage drop across resistors connected between the head and the tail of the fish when it is suspended in air (Caputi et al., 1989). By changing the value of such resistance ( $R_0$ ) we constructed a separate characteristic curve for the peak of each of the phases of alternating polarity in the EOD (its characteristic curve) (Caputi et al., 1989; Rodríguez-Cattáneo and Caputi, 2009).

The ordinate intersection represents the peak EMF (which is different for each wave) and the absolute value of the slope represents the internal resistance [ $R_i$ ; in general very similar across waves (Cox and Coates, 1938)]. In some species, wave components resulting from the activation of the electrocytes by the immediately preceding wave components show a parabolic relationship between current and voltage. This indicates a low excitability of the electrogenic membranes subservient to such components (Rodríguez-Cattáneo and Caputi, 2009).

The multiple air gap procedure allowed us to compare EOD waveforms generated by different regions of the fish's body (Caputi et al., 1993). Fish were suspended in air using a custom-made apparatus that holds the fish on a grill-like array of parallel wires. The wires in contact with the skin were perpendicular to the main axis of the body, one at each end of the fish and the other at the limits of each of the explored regions. Voltages were simultaneously recorded between pairs of wires, amplified to reach adequate amplitude for similar quantization (bit resolution always larger than 8 bits), sampled at 25 kHz and analyzed using custom MATLAB software (written by E.C. and A.R.-C.). For the purposes of this investigation, seven regions of the fish's body were considered; their lengths were adapted to cover the whole length of the fish. Because of the different origins of the wave components, several recordings were obtained for each fish with different configurations before finding the montage yielding the most representative picture of the EOD pattern. In general, regions showing larger changes in EMF for any of the components were explored with a greater resolution. The length of the six caudal regions varied in integer multiples of 1 cm. The remaining rostral portion corresponded to the rest of the fish.

In the multiple air gap condition, load is absent. Therefore, voltage recordings are considered good estimators of the equivalent electromotive forces generated by different portions of the fish's body for the components that are directly activated by synaptic action. To compare the expression of EO activation mechanisms from diverse regions (with different spacing between electrodes, i.e. gap length), we measured the amplitude of each peak and then normalized this amplitude by the length of the gap, expressed as a percentage of total length.

#### Additional electrophysiological techniques

The EMF pattern of two species (*G. javari* and *G. obscurus*) showed specific features that could not be assessed completely by the multiple air gap method. (1) At the head and abdominal region of *G. javari* we found a complex EOD, suggesting the presence of an expansion of the EO behind the cleithrum-opercular aponeuroses, as previously described in *G. coropinae* (Castelló et al., 2009). (2) In *G. obscurus*, we noted what we will henceforth describe as a 'facultative monophasic EOD', with a dominant positive component followed by a much lower-amplitude negative component, the amplitude of which is strongly dependent on the external load (Bell et al., 1976; Caputi et al., 1998; Rodríguez-Cattáneo and Caputi, 2009). To accommodate these novel features, three specimens of *G. javari* were explored with smaller size gaps (1 cm, starting from the snout) and one specimen using near-field recordings with the fish in water (see Near-field analysis, below). In *G. obscurus*, a differential load procedure was applied (see Simple air gap method with differential load, below).

#### Near-field analysis

Near-field analysis was performed to confirm the presence of electrogenic sources at the head region as well as body sources of opposite polarity that are activated synchronously. Electric fields

produced by the EOD were recorded with the fish resting in the middle of a net pen spanning two ends of a plastic tank (45×26 cm filled with water up to 4 cm depth, with conductivity 30  $\mu\text{S cm}^{-1}$ , temperature 24°C). The back and forth movements of fish were minimized using stitches to adjust the net to body length. We recorded two variables: (1) the longitudinal EOD field using two silver electrodes, each one of them placed at the center of each narrow face of the tank, parallel to the mid-line of the fish (i.e. one in front of the head and the other behind the tail); and (2) the potential gradient perpendicular to the side of the body (near field), measured along a line parallel to the fish skin at 2 mm distance from the closest point. Exploring electrode tips (2.5 mm apart, perpendicularly aligned to the body axis) were moved from head to tail at a slow and constant speed using a motorized driver, the position of which was continuously monitored. The voltage drop between exploring electrodes was measured using a high-input impedance, high-gain differential amplifier (10 Hz to 20 kHz band-pass filter, in-house constructed), and was digitized using a National Instruments 6016B digitizer at a sampling rate of 50 kHz and a resolution of 16 bits. For the analysis, we constructed a matrix where columns represent epochs of 10 ms before and 10 ms after the peak of the head-to-tail EOD taken every 1 mm ( $\pm 200 \mu\text{m}$ ) along the recording line. These measurements allowed us to qualitatively estimate (because distance was not perfectly constant due to the curvature of the body) the current density flowing outward and inward to the fish at different times and at different sites along the body.

#### Simple air gap method with differential load

The tail region of the biphasic *G. obscurus* specimen was further explored using a variation of the simple air gap method (Bell et al., 1976; Rodríguez-Cattáneo and Caputi, 2009). We split the load into two parallel 'one-way' paths of opposite direction using germanium diodes. By differentially changing the load on each branch we were able to explore the efficacy of the longitudinal currents associated with the main positive peak ( $V_3$ ) for eliciting the late negative peak ( $V_4$ ) at the tail region. While one diode allows the current generating  $V_3$  ( $I_3$ ) to flow through an externally controlled resistive path and block the current generating  $V_4$  ( $I_4$ ), the other allows the circulation of  $I_4$  through another externally controlled path, blocking  $I_3$ . It is important to note that when the absolute values of peak voltages are lower than the cut-off threshold of the diodes (300 mV), current does not circulate in any direction. However, when the absolute values of peak voltages are larger than the diode threshold, they are controlled by the external load. We used an 11-position step switch to modify an external load connected in series with a diode oriented in such a way that allowed only the flow of  $I_3$ . Thus, for a given position of the step switch we clamped the peak value of  $I_3$ . For each of the 11 positions of the switch (i.e. for each value of  $I_3$ ) we explored the voltage-current relationship of  $V_4$  by varying the resistance of a rheostat connected in series with the second diode. At the end of this series of experiments, we obtained 11 characteristic curves, one for each position of the switch. Because we found that voltage current was well fitted by a linear decreasing function (see Results) we were able to estimate the EMF generating  $V_4$  for each clamped value of  $I_3$ .

#### Anatomy and innervation of the electrogenic tissue

One or two specimens of each species were fixed after euthanasia. The structure of the EO and the distribution of the thin nerve bundles, as well as the arrangement of the electromotor nerve terminals on the electrocytes' surface, were studied using silver-impregnated samples. For this purpose, after a combined fixation and decalcification step

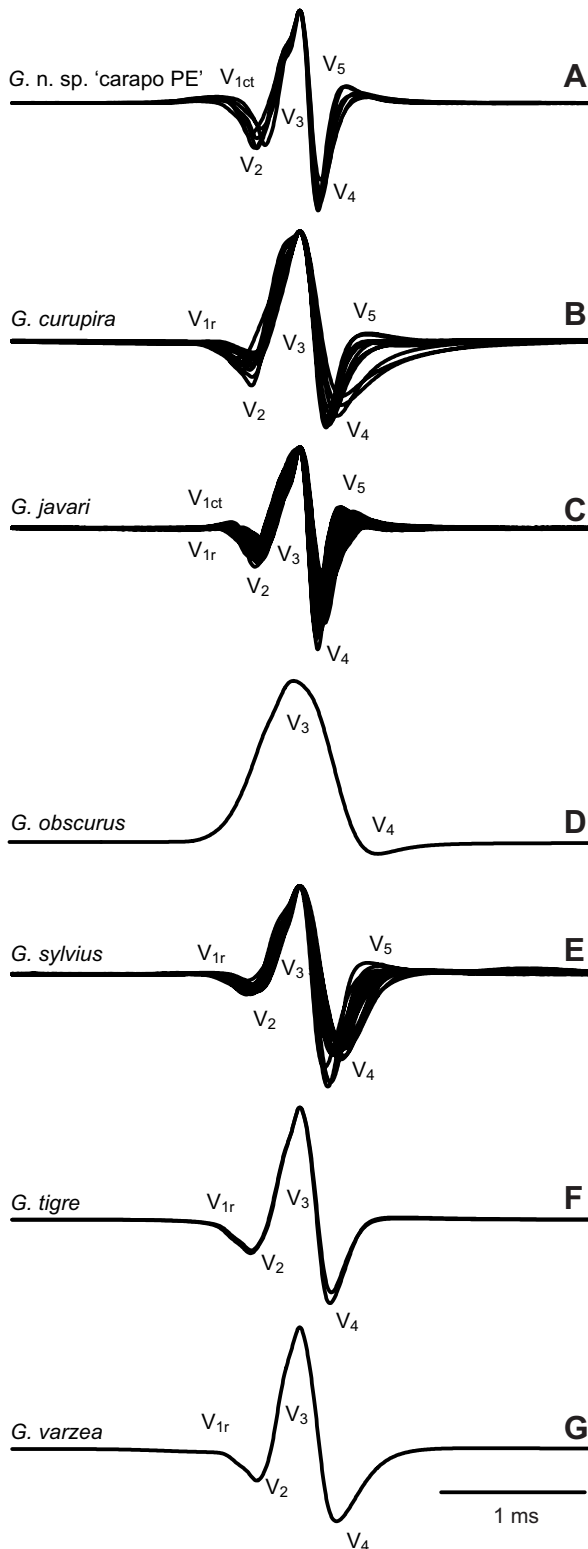

Fig. 1. Head-to-tail electric organ discharge (htEOD) waveforms of *Gymnotus*. Waveforms are plotted with head positivity upwards, and normalized and aligned to the peak amplitude of  $V_3/P_1$ . Wave components are labeled using the nomenclature introduced by Trujillo-Cenóz et al. (Trujillo-Cenóz et al., 1984) and modified by Rodríguez-Cattáneo et al. (Rodríguez-Cattáneo et al., 2008). This scheme is based on the ordinal number of wave components (labeled as V) in the sequence of deflections observed at the head to tail recordings, but also by their different origin and mechanisms of generation. Crampton and Albert's (Crampton and Albert, 2006) nomenclature (labeled as  $P_{-1}$  through  $P_3$ ) only takes into account the ordinal number of each relative maximum in the htEOD, assigning the position 1 to the main positive peak; thus only the last of the subsequent components of the same polarity are described. The equivalence is:  $P_{-1}=V_{1ct}$ ,  $P_0=V_1+V_2$ ,  $P_1=V_3$ ,  $P_2=V_4$  and  $P_3=V_5$ . Scale bar, 1 ms. Note that head-to-tail recordings in water are significantly different from traces obtained with the simple air gap method (compare trace A in this figure with traces A and B in the following figures). This is because, although in both cases the htEOD is the weighted sum of the regional electromotive forces, the weighting vector is different in each case. While in the air gap condition the weighting factor is 1 for every region, in water it is a function of the ratio between internal resistance of the fish's body region and water resistance [the rationale behind these arguments can be found in Caputi and Budelli (Caputi and Budelli, 1995)].

mandibular and abdominal wall regions were sectioned horizontally ( $200\mu\text{m}$ ) to search for a possible portion of the EO extending into the head region as suggested by the electrophysiology. Sections were stained with a solution of Methylene Blue (1%), dehydrated and mounted in resin. All slides were explored under a light microscope and digitally converted using a variety of optical and digital camera resolutions.

#### Nomenclature of waveform components

For the detailed spatial analysis of the EOD we use the wave components nomenclature introduced by Trujillo-Cenóz et al. (Trujillo-Cenóz et al., 1984) for *G. omarorum* (Richer de Forges et al., 2009) with amendments by Rodríguez-Cattáneo et al. (Rodríguez-Cattáneo et al., 2008). In Fig. 1 we describe the correspondence between this nomenclature and that introduced by Crampton and Albert (Crampton and Albert, 2006) for the far-field head-to-tail recordings. It is important to note that the nomenclature of the wave components is not only based on the electrophysiological recordings, but we also take into account the presence of anatomical data, suggesting by spatial correlation a generation mechanism. For each region we identified the main positive component (defined as  $V_3$ ) and verified that it was accompanied by caudally innervated electrocytes. Second, in traces where a negative peak preceded  $V_3$ , we identified the presence of rostrally innervated electrocytes to define this peak as  $V_2$ . Taking into account the curarization experiment [reported elsewhere (Caputi et al., 1989; Caputi et al., 1994; Caputi and Aguilera, 1996; Rodríguez-Cattáneo and Caputi, 2009)] in which the activity following  $V_3$  was shown to be the consequence of electrocyte responsiveness, we defined the first negativity after  $V_3$  as  $V_4$ , and the first positivity after  $V_3$  as  $V_5$ . In the case of  $V_1$ , we found two slow waves: one originated at the head ( $V_{1r}$ ) and another (positive) originated at the limit between the central and caudal region of the body. Finally, we found a particular  $V_3$  associated with the presence of a rostral extension of the EO; this was studied in detail elsewhere and is referred to as  $V_{3r}$  (Castelló et al., 2009).

## RESULTS

### Far-field head-to-tail EOD recorded in water

All species of *Gymnotus* exhibit a main positive wave peak ( $V_3$ ) followed by a negative peak of species-dependent amplitude and

[using De Castro's formula (Ramón y Cajal and De Castro, 1933)], a portion of the middle part of the body and a portion of the tail were impregnated with silver ( $\text{AgNO}_3$ , 1.5%, 7 days at  $37^\circ\text{C}$ ) and subsequently reduced in formaldehyde-hydroquinone. Tissues were embedded in a soft mixture of epoxy resin and sectioned ( $30\mu\text{m}$  thick) either frontally or parasagittally. In two *G. javari* specimens, the whole head and abdominal wall was fixed in formalin as a single piece. After decalcification, the cranium was removed. The remaining

duration ( $V_4$ ; Fig. 1). *Gymnotus obscurus* differs from all other congeners in exhibiting a quasi-monophasic EOD in which the  $V_3$  peak is followed by a very low-amplitude, load-dependent  $V_4$  peak. In all the remaining species, the EOD starts with slow negative components of low amplitude ( $V_{1r}$ ), and the  $V_3$  peak is preceded by a negative peak ( $V_2$ ). A low-amplitude, late positive component ( $V_5$ ) is present in *G. n. sp. 'carapo PE'*, *G. javari*, *G. sylvius* and *G. tigre* and facultative in *G. curupira* (six out of nine specimens). An early positive component ( $V_{1ct}$ ) was observed in *G. n. sp. 'carapo PE'*, *G. sylvius* and *G. varzea*. Finally, likely associated with sexual differentiation (Crampton et al., 2011), we observed differences in the amplitude of  $V_4$  in *G. javari* and *G. curupira*. Metrics on the amplitudes of each peak as well as the peak power frequency of the recorded head-to-tail EODs are presented in Table 1.

### Spatiotemporal pattern of EMF and its anatomical correlates

In the following sections we describe in detail the spatial analysis of the EOD waveforms and their morphological correlates for the seven newly studied species reported here.

#### *Gymnotus n. sp. 'carapo PE'*

The head-to-tail EOD waveform of this species recorded in air is hexaphasic, with the waveforms closely resembling those of *G. carapo* SU (see Rodríguez-Cattáneo et al., 2008).

Before the principal peak ( $V_3$ ) occurs (Fig. 2A), there is a series of deflections comprising a brief low-amplitude positive phase ( $V_{1ct}$ ) flanked by two negative phases,  $V_{1r}$  and  $V_2$  (see Fig. 2B at another scale for the detailed pattern). After the main positive peak there is a sharp negative wave ( $V_4$ ) followed by a smooth positive wave ( $V_5$ ). With the multiple air gap method (Fig. 2C), these components can be identified as independent because, although they partially overlap in time, their spatial domains are clearly confined to discrete regions at different positions along the body coinciding with a plausible anatomical substrate for explaining their generation.

As in most species of *Gymnotus*,  $V_1$  is generated in the abdominal region and  $V_2$  in the central part of the body (Fig. 2C–F). Accordingly, at abdominal and central regions of the EO, Cajal's silver impregnations (Fig. 2G) show very large doubly innervated electrocytes. The early positive component ( $V_{1ct}$ ; Fig. 2C, arrow) is generated at approximately the transition between the central and tail regions of the fish's body. The very early appearance of this component, and the presence of a large posterior electromotor nerve at the generation site, suggest a possible neural origin. The three last wave components ( $V_3$ ,  $V_4$  and  $V_5$ ) are generated all along the EO, receiving the contribution of caudally innervated electrocytes

mainly at the tail, where they are more densely packed (Fig. 2D–H). Peak amplitude measured in volts per unit length of the recorded portion increases with electrocyte density in a rostro-caudal direction along the domain of every component except  $V_{1r}$  and  $V_{1ct}$ , which are instead very localized (Fig. 2D–H).

#### *Gymnotus curupira*

This species is tetraphasic. The EMF pattern generated by this species is similar to that shown by *G. omarorum*, although the amplitude of the EOD in *G. curupira* is weaker than in *G. omarorum* (Caputi et al., 1993; Rodríguez-Cattáneo and Caputi, 2009) for every component, and the regional waveforms have a higher peak power in every region of the body (Fig. 3). Anatomical studies suggest that  $V_1$  is generated at the abdominal region by the rostral faces of doubly innervated electrocytes;  $V_2$  is generated at the central region by the rostral faces of very large doubly innervated electrocytes at the central region of the EO (Fig. 3A,B); and the complex  $V_3$  and  $V_4$  along the entire EO is generated by all electrocytes (Fig. 3C–E). Peak amplitude measured in volts per unit length of the recorded portion increases in a rostro-caudal direction along the domain of every component (Fig. 3C,D). In some specimens  $V_4$  ends with a gradual decline in voltage, as does the  $V_4$  component of *G. omarorum*, but in others there is a clear  $V_5$ .

#### *Gymnotus javari*

The spatiotemporal pattern of EMF and the anatomy of *G. javari* are much closer to those documented in *G. coropinae* (Castelló et al., 2009; Rodríguez-Cattáneo et al., 2008) than to other species (Fig. 4A).

Electrogenesis starts at the head, where a very slow head negative component ( $V_{1r}$ ) is followed by a head positive peak ( $V_{3r}$ ; Fig. 4A,B). A multiple air gap with 1 cm resolution showed that these components are generated at the peri-opercular region (Fig. 4B). Fig. 4C, D and E illustrate the amplitude of the regionally generated EMF for  $V_2$ ,  $V_3$  and  $V_4$ , respectively, as a function of the distance from the snout.

Consistently, anatomy revealed electrocytes in the posterior region of the head. Fig. 5A shows a ventral view of the superimposed traces, outlining the electrogenic structures observed in serial horizontal sections of the abdominal wall and floor of the mouth. As observed in the horizontal and oblique sections (Fig. 5B), a row of electrocytes is aligned parallel to the aponeurotic sheath connecting the operculum to the cleithrum. At approximately the midline, another pair of longitudinal rows of electrocytes (continuing the abdominal regions of the EO) converges with these two oblique

Table 1. Amplitudes of the head-to-tail electric organ discharge of seven species of *Gymnotus* and the individual wave components  $V_2$  through  $V_5$

| Species                      | N   | $V_2$              | $V_3$             | $V_4$              | $V_5$               | Peak power frequency (kHz) | Peak-to-peak amplitude ( $\text{mV cm}^{-1}$ at 10 cm) |
|------------------------------|-----|--------------------|-------------------|--------------------|---------------------|----------------------------|--------------------------------------------------------|
| <i>G. n. sp. 'carapo PE'</i> | 6   | $-0.203 \pm 0.040$ | $0.492 \pm 0.030$ | $-0.508 \pm 0.030$ | $0.053 \pm 0.023$   | $1.990 \pm 0.173$          | $135.02 \pm 85.27$                                     |
| <i>G. curupira</i>           | 9   | $-0.147 \pm 0.063$ | $0.602 \pm 0.035$ | $-0.398 \pm 0.035$ | $0.008 \pm 0.014^*$ | $1.380 \pm 0.107$          | $64.27 \pm 25.73$                                      |
| <i>G. javari</i>             | 119 | $-0.140 \pm 0.031$ | $0.496 \pm 0.036$ | $-0.504 \pm 0.035$ | $0.061 \pm 0.022$   | $1.989 \pm 0.173$          | $29.45 \pm 13.59$                                      |
| <i>G. obscurus</i>           | 1   |                    | 0.939             | -0.057             |                     |                            | 245.03                                                 |
| <i>G. sylvius</i>            | 17  | $-0.098 \pm 0.022$ | $0.515 \pm 0.034$ | $-0.487 \pm 0.034$ | $0.006 \pm 0.014$   | $1.297 \pm 0.173$          | $656.19 \pm 258.50$                                    |
| <i>G. tigre</i>              | 2   | $-0.169 \pm 0.016$ | $0.588 \pm 0.024$ | $-0.413 \pm 0.025$ |                     | $1.385 \pm 0.022$          | $832.66 \pm 60.50$                                     |
| <i>G. varzea</i>             | 1   | -0.168             | 0.628             | -0.373             |                     | 1.218                      | 372.28                                                 |

Peak-to-peak amplitude was calibrated according to the method described by Franchina and Stoddard (Franchina and Stoddard, 1998). Relative amplitude of the main peaks is normalized by the peak-to-peak htEOD amplitude.

Values represent means  $\pm$  s.d.

\*Only six out of nine animals showed  $V_5$ .

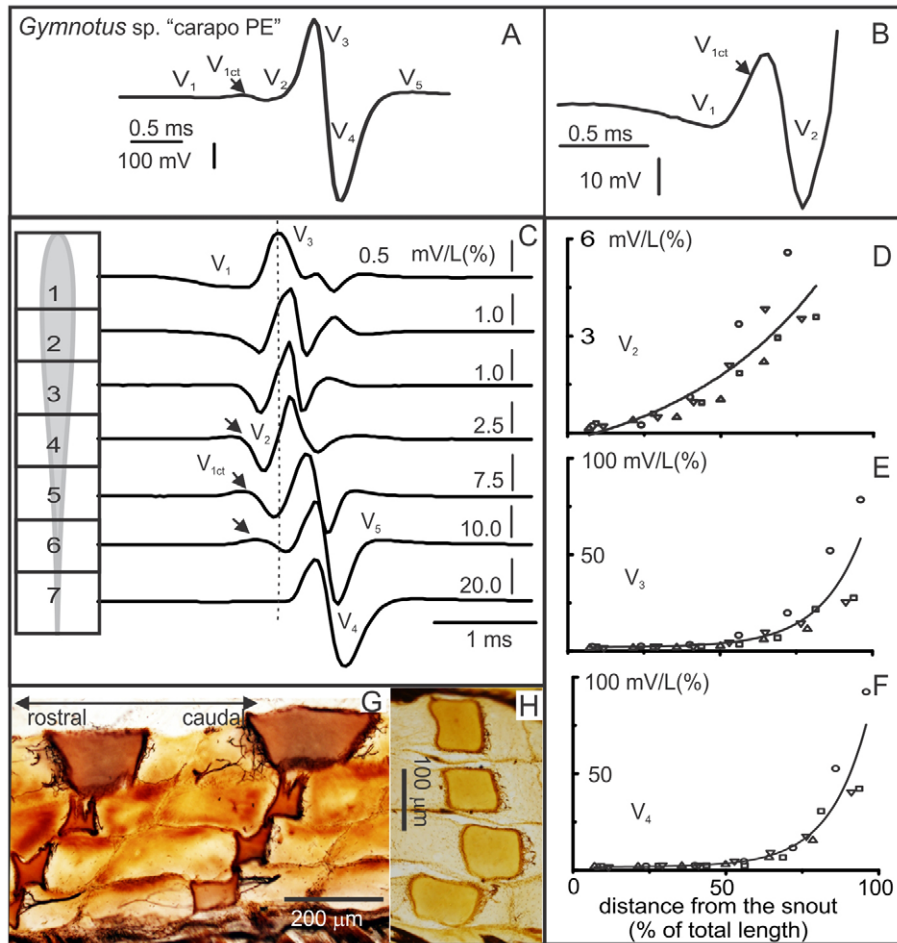

Fig. 2. *Gymnotus* n. sp. 'carapo PE'. (A) Head-to-tail electromotive force (EMF) as recorded in single air gap. One can observe several components before the main positive peak  $V_3$ . This trace is the sum of the EMFs from different body regions. (B) Larger magnification of the trace in A illustrates how earlier components  $V_{1r}$ ,  $V_{1ct}$  and  $V_2$  partially overlap in time. Because of their opposite polarity and different spatial origin, their amplitudes are relatively reduced. (C) EMF pattern recorded using the multiple air gap method shows regional variations in the EOD EMF pattern. Note that: (1) the weak early components shown in B have different spatial origins; (2) the smooth negative component  $V_1$  occurs mainly in gap 1 but is not seen in the caudal gaps; (3) the weak positive component  $V_{1ct}$  is generated in gaps 4, 5 and 6 (arrows); and (4) the spatial domain of  $V_2$  extends from gap 2 to gap 6. A vertical dotted line was drawn in order to show the progress of the activation along the electric organ (EO). (D–F) Amplitude of the three main components  $V_1$ – $V_2$ ,  $V_3$  and  $V_4$  as a function of the generator position. The abscissa ( $x$  in the fitting expressions) represents the distance between the snout and the middle point between two successive electrodes (expressed as a percentage of fish length). The ordinate represents the peak voltage divided by the inter-electrode percentage of total fish length. In this species the EMF of the three components were well fitted by an exponential function:  $V_2=1.39+1.16 \times \exp(2.01x)$ ,  $r^2=0.78$ ;  $V_3=0.97+0.05 \times \exp(7.25x)$ ,  $r^2=0.75$ ;  $V_4=0.11+0.03 \times \exp(8.03x)$ ,  $r^2=0.88$ ;  $N=27$ . (G,H) Images obtained from parasagittal sections of silver-impregnated EOs (a collage was made to maintain in focus the relevant features of the electrocytes and their innervation). At the central region of the fish (gap 4, G) *G. sp.* 'carapo PE' shows doubly innervated electrocytes in the most dorsal column of the EO. The other three rows show simple, caudally innervated electrocytes of smaller size (concave shape is due to tissue retraction in this sample). At the tail region all electrocytes are singly innervated (H).

rows to form an arrow-like profile (Fig. 5A). The quality of our material was not sufficient to analyze the innervation pattern of this portion of the EO. However, comparative analysis with *G. coropinae* and near-field recordings (see below) suggest that these portions are responsible for the slow and rostral  $V_{1r}$ – $V_{3r}$  complex. The pattern observed at the central and caudal regions of the body (Fig. 5C) can be explained as in other multiphasic species. A dorsal row of long, doubly innervated electrocytes, present from the abdominal to the tail region, may explain  $V_2$ . However, one must remark that in this species,  $V_2$  has two peaks at different distances from the snout (25% and 75% of fish length, respectively; Fig. 4C). The caudal quarter of the body has four similar rows of small caudally innervated electrocytes with smaller inter-electrocyte distances (Fig. 5D). Finally, the complex  $V_{3-4.5}$  extends from the abdominal region to

the tip of the tail and increases in amplitude in a rostral-caudal direction (Fig. 5C,D).

Our discovery of electrogenic tissue extending rostrally into the head region motivated us to illustrate a higher resolution electrophysiological analysis of the near field in detail (Fig. 6). Recordings of near fields adjacent to the fish's body taken perpendicular to the skin confirmed the hypothesis that the very early negative potential ( $V_{1r}$ ) is generated at the rostral expansion of the EO (Fig. 6A,B). The field is very complex at the time labeled as  $t_2$  in Fig. 6A,C. Rostrally, it shows two reversal points flanking a large sink, with the rostral source sharply localized and the caudal source exhibiting two maxima. These findings suggest that the near field around the head is dominated by the local generators. This local field has important differences with the far field (Fig. 5A, inset),

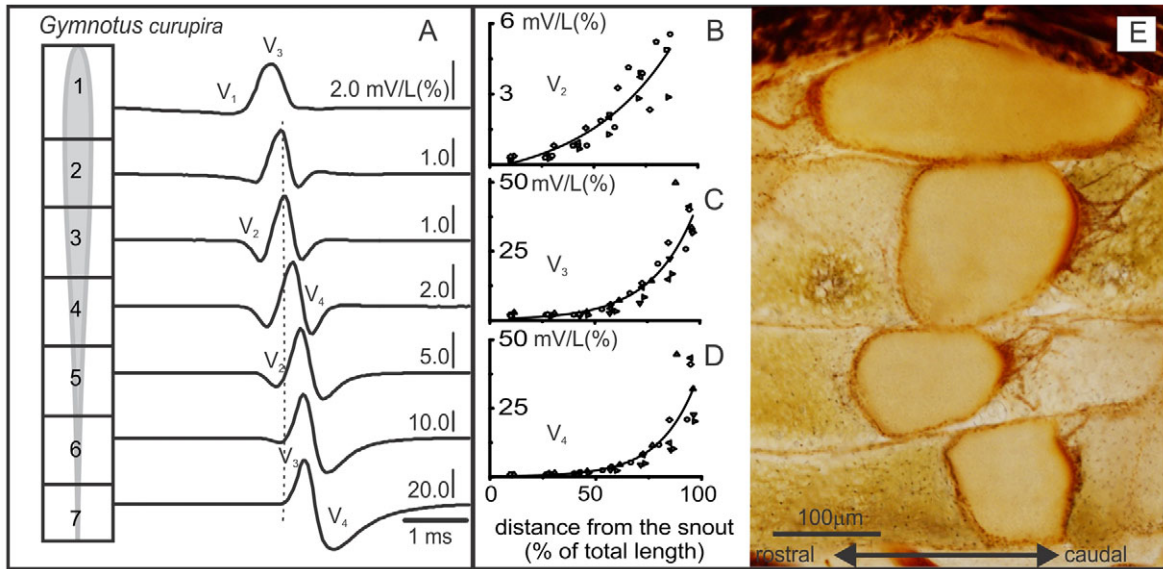

Fig. 3. *Gymnotus curupira*. (A) Spatiotemporal pattern of EMF as depicted by the multiple air gap method. The EOD of this species has four components ( $V_1$ – $V_4$ ). There is a single early smooth negative component  $V_1$  originated in gaps 1 and 2 (abdominal region). A vertical dotted line was drawn in order to show the progress of the activation along the EO. The EMF of the regional peaks is plotted as a function of the position of the generator for  $V_1$ – $V_2$  (B),  $V_3$  (C) and  $V_4$  (D), as in Fig. 2. The spatial contributions to the main peaks were well fitted by exponential functions:  $V_2=0.89+0.75 \times \exp(2.36x)$ ,  $r^2=0.83$ ;  $V_3=0.18+0.35 \times \exp(4.82x)$ ,  $r^2=0.85$ ;  $V_4=0.63+0.11 \times \exp(5.83x)$ ,  $r^2=0.76$ ;  $N=34$ . (E) Cajal's silver-impregnated material of the central region showing doubly innervated electrocytes at the most dorsal row and single caudally innervated electrocytes in the three ventral rows (a collage was made to maintain in focus the relevant features of the electrocytes and their innervation).

which is instead dominated by the generators at the central and tail regions of the fish's body and yields the main components  $V_3$ ,  $V_4$  and  $V_5$  ( $t_3$ – $t_6$  in Fig. 5D–G).

*Gymnotus obscurus*

The single specimen available for this species exhibited a biphasic head-to-tail EOD in the simple air gap comprising a dominant positive component ( $V_3$ ) followed by a low-amplitude negative

component ( $V_4$ ; Fig. 7A, inset). The negative component ( $V_4$ ) was load-dependent, such that with decreasing external resistance exhibited a mild increase in amplitude (Fig. 7A inset; compare black trace under low resistance load and red trace under high resistance load). This different behavior of  $V_3$  and  $V_4$  are described by the characteristic curves (Fig. 7A,B, respectively). This motivated the detailed analysis of this feature under the differential load procedure introduced by Bell et al. (Bell et al., 1976) and

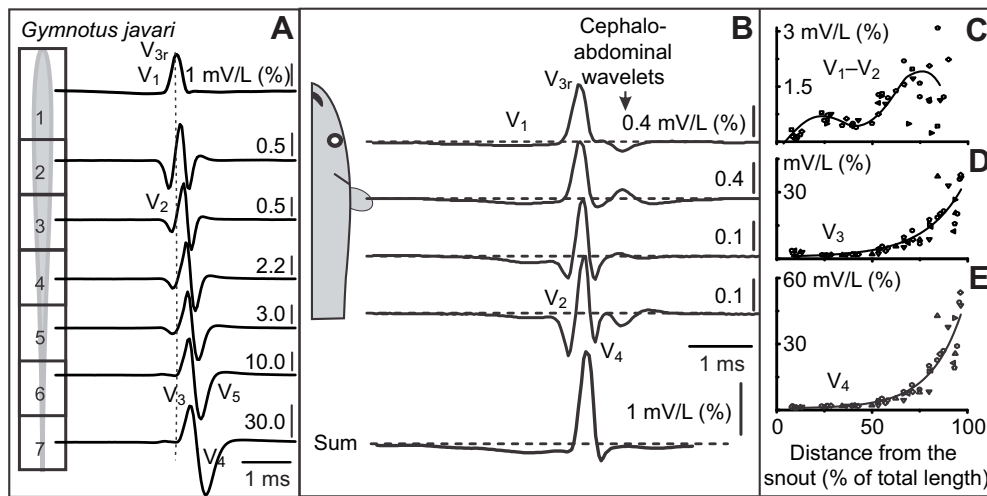

Fig. 4. *Gymnotus javari*. (A) Spatiotemporal pattern of EMF recorded using the air gap method. The EMF at the rostral gap starts with a smooth negative long-lasting component, barely seen in the head-to-tail EOD (see Fig. 1C). A vertical dotted line was drawn in order to show the progress of the activation along the EO. (B) Detail of the head and abdominal waveforms with the multiple air gap method shows the very rostral origin of  $V_1$  and the abdominal origin of  $V_3$ . In some specimens, including the one illustrated here, the EOD was followed by some non-constant wavelets (arrow). (C–E) The EMF of the regional peaks is plotted as a function of the position of the generator for  $V_1$ – $V_2$  (C),  $V_3$  (D) and  $V_4$  (E), as in Figs 2, 3. The early  $V_1$ – $V_2$  negative wave component has a bimodal distribution, as indicated by an 'eye-fitted' curve. The EMF for  $V_3$  and  $V_4$  was well fitted by exponential functions:  $V_3=0.09+0.27 \times \exp(4.89x)$ ,  $r^2=0.80$ ;  $V_4=0.35+0.13 \times \exp(5.99x)$ ,  $r^2=0.85$ ;  $N=56$ .

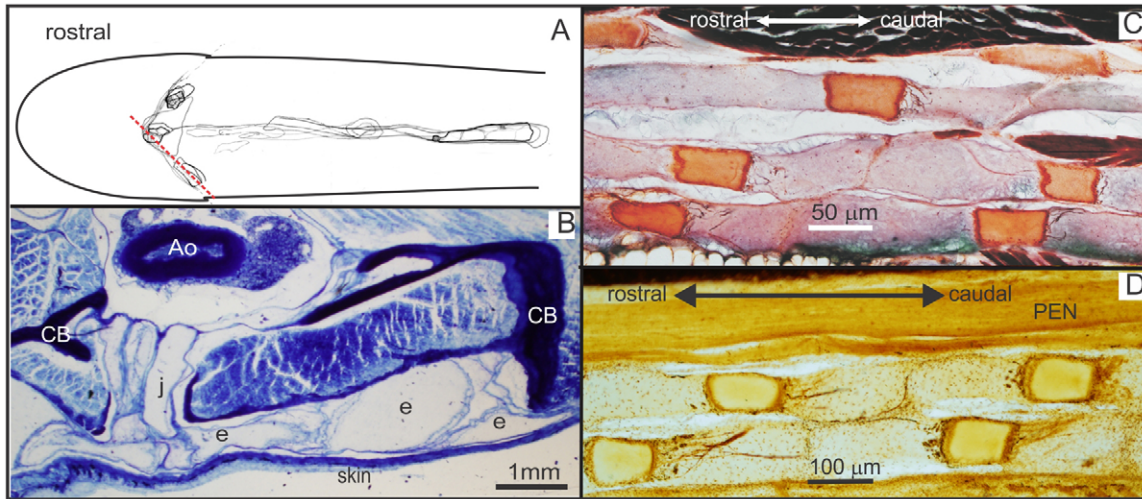

Fig. 5. *Gymnotus javari*. Anatomy of the EO. (A) Superimposed outlines of the EO as observed in serial horizontal sections of the mouth floor and abdominal wall, showing the presence of a rostral expansion of the EO following the caudal limit of the head, as demarcated by the cleithrum-opercular aponeurotic sheath. (B) Slices taken from another individual in the oblique direction (indicated by the red dotted line in A), showing three electrocytes (e) below the cleithrum bone (CB). Ao, aorta; j, inter-electrocyte jelly. (C) Parasagittal sections of Cajal's silver-impregnated material taken from the middle region of the fish body (gap 4), showing double innervation on caudal and rostral faces of the electrocytes of the dorsal row, and single caudal innervations of the electrocytes at the other three rows. (D) Parasagittal section of Cajal's silver-impregnated material, showing two of the four rows (the other two rows were not contained in this section) of caudally innervated electrocytes at the tail region (gap 6). Note a thick posterior electromotor nerve (PEN), wider than the electrocytes (a collage was made to maintain in focus the relevant features of the electrocytes and their innervation).

applied by Rodríguez-Cattáneo and Caputi (Rodríguez-Cattáneo and Caputi, 2009) for the analysis of a similar problem in the tail region of *G. omarorum*. Clamping the longitudinal current associated with  $V_3$  ( $I_3$ ), we were able to construct 10 different characteristic curves of  $V_4$  (for clarity, only five graphs were

superimposed in Fig. 7C). The slopes of these plots are similar, and the ordinate values of the fitting lines increase with  $I_3$  (Fig. 7D). This confirms that  $V_4$  is load dependent and indicates that the auto-excitability of the EO in this species is markedly lower than in other species of *Gymnotus*.

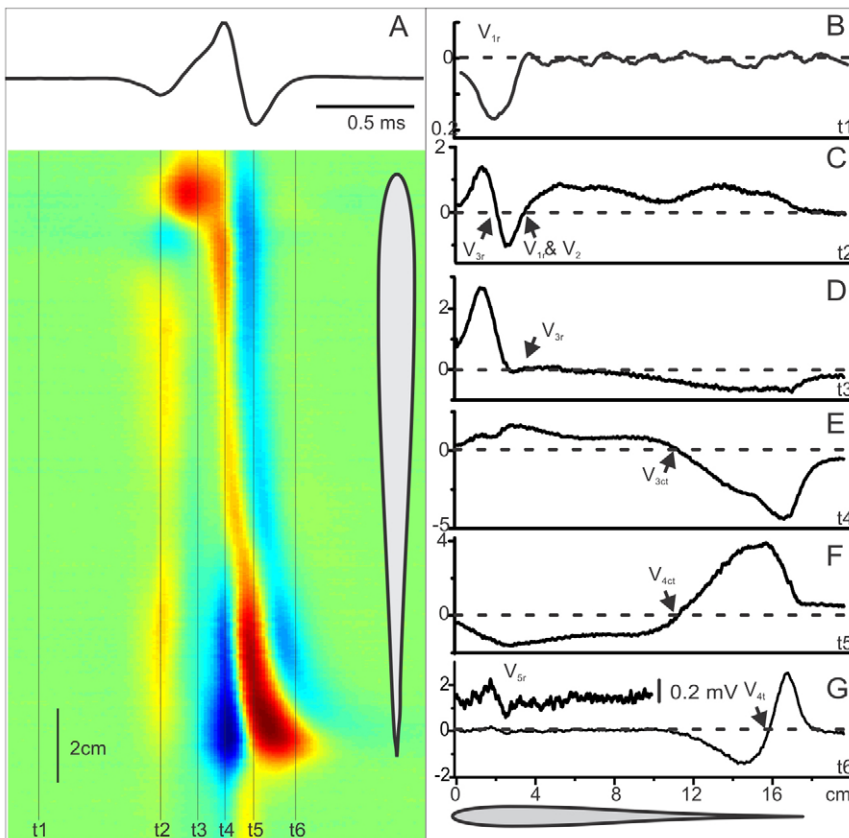

Fig. 6. Detailed analysis of the EOD of *Gymnotus javari*. (A) Transcutaneous current pattern showing sinks (blue) and sources (red). Each vertical line ( $t_1$ – $t_6$ ) indicates the time at which the current profiles in panels B to G were measured. The head-to-tail EOD is shown as a reference at the top of A. (B) A slow activity caused by a very localized sink at the head region (note that the reversal point, rostral sink–caudal source at  $t_1=1.0$  ms before  $V_3$  in the head-to-tail EOD, is located at the head region). (C) After a relatively long period of time ( $t_2=0.3$  ms before  $V_3$ ), there is an abdominal sink surrounded by two sources, one at the head, and the other distributed along the rest of the body. (D) At  $t_3=0.15$  ms before  $V_3$ , the rostral source is still present, having a distributed sink on the rest of the body. This corresponds to  $V_{3r}$ , which is probably generated by the expanded portion of the EO. (E) At the peak time ( $t_4=0$  ms), all the fish's body becomes an extended generator with the reversal point slightly caudal to the center of the fish. (F) At  $t_5=0.15$  ms after  $V_3$  the pattern reverses, as a mirror image of  $V_3$  (this corresponds to  $V_4$ ). (G) The reversal point of  $V_4$  shifts caudally with time ( $t_6=0.35$  ms after  $V_3$ ) and a small  $V_5$  starts to appear in the head (magnified in the inset). The EOD ends with a small rebound wave at the tail region (caudal  $V_5$ , pattern not shown).



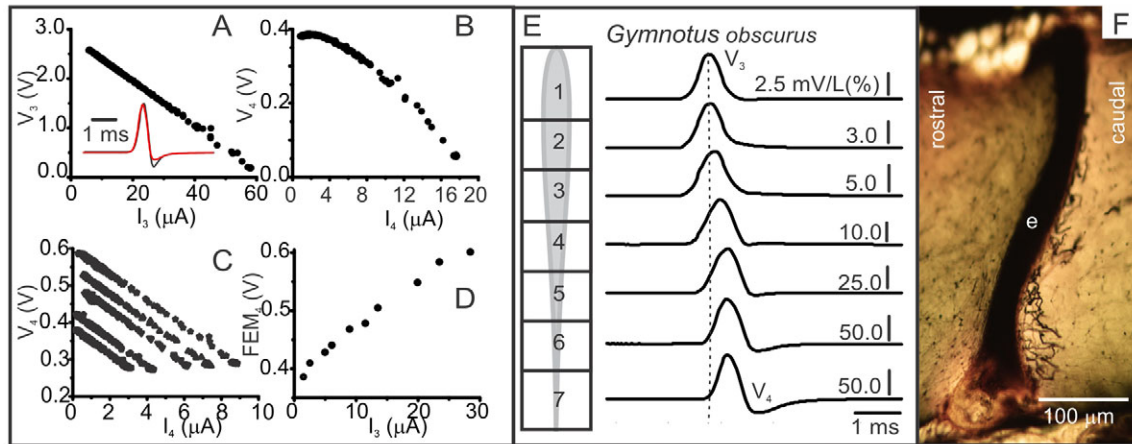

Fig. 7. *Gymnotus obscurus*. This species lacks negative early components preceding the positive peak. (A,B) The simple air gap method shows that while the positive peak ( $V_3$ ; A) is not affected by external load, the negative peak (homologous to  $V_4$ ; B) is relatively reduced for large values of the loading resistor. Taking into account our previous experiments on *G. omarorum* (Rodríguez-Cattáneo and Caputi, 2009), we studied this load dependence using a differential load procedure that allowed us to clamp the external current flow during  $V_3$  ( $I_3$ ). (C) Voltage versus current plots obtained using different clamped  $I_3$  currents show a similar slope (internal resistance) but an EMF largely dependent on the clamped current (ordinate value). (D) Relationship between the EMF of  $V_4$  ( $EMF_4$ ) and the clamped  $I_3$ . Note that the EMF increases by more than 50%. (E) The EMF pattern shows an exponential growth of  $V_3$  as a function of the generator position [distance from the snout expressed as a percentage of total length;  $V_3 = -6.92 + 5.46 \times \exp(3.05x)$ ,  $r^2 = 0.93$ ,  $N = 7$ ], and the presence of the small  $V_4$  at the tail region. A vertical dotted line was drawn in order to show the progress of the activation along the EO. (F) A single sample obtained from the middle part of the fish (gap 4) was impregnated using Cajal's technique. Sections from this sample show electrocytes innervated only on their caudal faces.

The multiple air gap procedure demonstrated that *G. obscurus* has two wave components: a large positive component ( $V_3$ ), and a very small negative, load-dependent component ( $V_4$ ). The spatiotemporal pattern of electromotive force (Fig. 7E) shows that  $V_3$  is generated all along the EO and increases exponentially from head to tail, while  $V_4$  is generated at the caudal third of the fish's body. In this caudal third, the ratio  $V_4/V_3$  also increases in a rostro-caudal direction.

A single sample of the central region of the EO of this specimen was analyzed anatomically. In this sample, we found four rows of flat electrocytes on each side. We were unable to find rostral innervation of the electrocytes of the dorsal row of the EO (Fig. 7F).

#### *Gymnotus sylvius*

Similarly to *G. carapo* SU, the head-to-tail EOD waveform of this species recorded in air by the single air gap method is hexaphasic. Before  $V_3$ , there is a series of two smooth deflections ( $V_{1r}$ – $V_{1ct}$ ) and one sharp peak ( $V_2$ ). After  $V_3$ , a sharp negative ( $V_4$ ) wave and a smooth positive ( $V_5$ ) wave were observed in all specimens (Fig. 8A). However, compared with *G. carapo*, *G. sylvius* shows larger EMF and synchrony.

The multiple air gap method shows that the two small and early components observed in the head to tail ( $V_{1r}$ – $V_{1ct}$ ) can be identified as independent because of their different origin along the body (Fig. 8B). As in *G. carapo* SU (Rodríguez-Cattáneo et al., 2008), the negative component ( $V_{1r}$ ) starting the EOD waveform is generated abdominally and the positive component ( $V_{1ct}$ ) is generated at approximately the transition between the central and tail regions of the fish's body.

The central region of the EO consists of a dorsal row of very large doubly innervated electrocytes, explaining  $V_2$  (Fig. 8C,F), and three rows of small caudally innervated electrocytes on each side, explaining the complex  $V_{3-4-5}$ . The caudal quarter has four similar rows of small caudally innervated electrocytes, which exhibit a

smaller inter-electrocyte distance, explaining the larger peak amplitude of the measured complex  $V_{3-4-5}$ . Consistently with the neurogenic hypothesis of  $V_{1ct}$ , a large electromotor nerve is observed at the transition between the central and tail regions (Fig. 8D,E,G).

#### *Gymnotus tigre*

The head-to-tail waveform of this species recorded in air is pentaphasic, showing a negative  $V_{1r}$  and a late positive  $V_5$  besides the main complex  $V_{2-3-4}$ . The spatiotemporal pattern of EMF (Fig. 9A) shows that  $V_1$  is generated at the abdominal region,  $V_2$  at the central region and the complex  $V_{3-4}$  along the entire EO. At gaps 4, 5 and 6, a small  $V_5$  was observed in the two studied specimens. The EMF of all components increases in a rostro-caudal direction within their regional domains. As expected from this pattern, the central region of the EO consists of four rows of electrocytes with a dorsal row of doubly innervated electrocytes (Fig. 9B). At the tail region there are four rows of small and caudally innervated electrocytes (Fig. 9C).

#### *Gymnotus varzea*

We procured a single specimen of *G. varzea* for this study. The head-to-tail waveform of this species recorded in air is tetraphasic. In the air gap analysis of this single specimen, only six gaps were obtained (the activity of the most caudal gap was not recorded because the tip of the tail moved during the experiment). The spatiotemporal pattern of EMF (Fig. 10A) indicates that in this species'  $V_1$  is generated at the abdominal region, and the complex  $V_{2-3-4}$  is generated along the rest of the fish's body. In the last available gap, which in this specimen comprised the anterior portion of the tail, a biphasic pattern preceded by the activity of the posterior electromotor nerve was observed (Fig. 10A, arrow). Consistently with this pattern, at the abdominal and central regions, a dorsolateral row of electrocytes is doubly innervated, whereas at the tail only single-innervated electrocytes are observed.

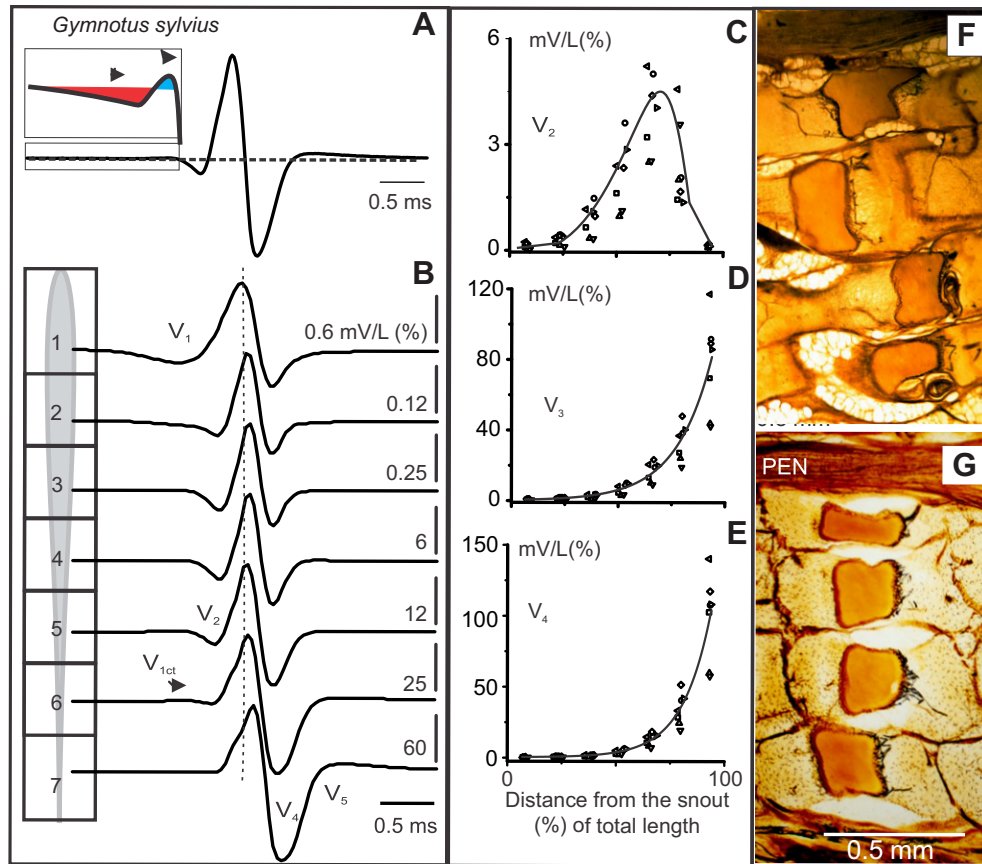

Fig. 8. *Gymnotus sylvius*. (A) Head-to-tail EMF as recorded in the single air gap. This trace is the sum of the EMFs from different body regions. Two different components previous to the main positive peak ( $V_3$ ) can be distinguished: an early negative positive component ( $V_{1r}$ , inset red filled regions) followed by a positive one ( $V_{1ct}$ , inset blue filled regions). (B) Spatiotemporal pattern of EMF as depicted by the multiple air gap method. A vertical dotted line was drawn in order to show the progress of the activation along the EO. The EOD of this species has six components ( $V_{1r}$ – $V_5$ ). There is a single, early, smooth negative component ( $V_{1r}$ ) originating in gaps 1 and 2 (abdominal region). The positive early component ( $V_{1ct}$ ) is generated at the transition between the central and tail regions of the fish body (gap 6). (C–E) The EMF of the regional peaks is plotted as a function of the position of the generator for  $V_{1r}$ – $V_2$  (C),  $V_3$  (D) and  $V_4$  (E), as in Figs 2, 3 and 5. The spatial contributions to the main peaks were well fitted by exponential functions:  $V_3=4.22+2.67 \times \exp(0.81x)$ ,  $r^2=0.85$ ;  $V_4=2.49+6.15 \times \exp(6.5x)$ ,  $r^2=0.9$ ;  $N=49$ . (F) Cajal's silver-impregnated material of the central region showing doubly innervated electrocytes at the most dorsal row (asterisk) and caudally innervated electrocytes in the three ventral rows. (G) Caudally innervated electrocytes of the caudal region. As in previous figures, a collage was made to maintain in focus the relevant features of the electrocytes and their innervation. PEN, peripheral electromotor nerve.

## DISCUSSION

### Waveform diversity can be explained by a combination of five different anato-functional factors

We have studied 11 species belonging to two of the three main clades of the genus *Gymnotus* (Lovejoy et al., 2010). To facilitate the description and discussion of EOD diversity, we have grouped the known EOD patterns into four main anato-functional groups based on the combination of mechanisms as is described in Table 2.

Group I is represented by two species in our studies, *G. coropinae* and *G. javari*, both small species with a weak EOD that clearly exhibits two components in terms of frequency components and generation sites: (1) a sharp multiphasic component with a peak power at very high-frequency ranges generated at the central and caudal regions; and (2) a slower component with a power spectra peaking at lower frequencies generated by an expanded region of the EO that protrudes into the head under the cleithral aponeurotic sheath. The abdominal region contributes to both components.

The slow component generated mainly at the head extension of the EO can be described with the multiple air gap by two main deflections generated at the innervated faces of the electrocytes. The

head negative deflection originates from rostrally innervated electrocytes and is represented in the near field by a source at the bi-opercular level. The head positive deflection is a peak preceding the caudally generated multiphasic component. This peak (which is broader and earlier than that generated at the central and caudal regions) is caused by the activation of the lateral faces of very large electrocytes. These electrocytes, which are oriented along the cleithrum, create sinks at both of the opercula, and a single source at the oral and perioral regions.

The sharp multiphasic component consists of a  $V_{2-3-4-5}$  sequence in which the origin of the different waves reflects the different innervation pattern of the EO. The sequence originating at the central region has its anatomical counterpart in the presence of a row of doubly innervated electrocytes on the same longitudinal domain. Rostral innervation of these doubly innervated electrocytes explains the head negative onset of this multiphasic discharge at the central region. Caudal innervations of the remaining electrocytes in this region explain the presence of the main positive component ( $V_3$ ). Likewise, the large auto-excitability of the EO explains the sharpness of  $V_4$  and the presence of  $V_5$ . The contribution of the more caudal

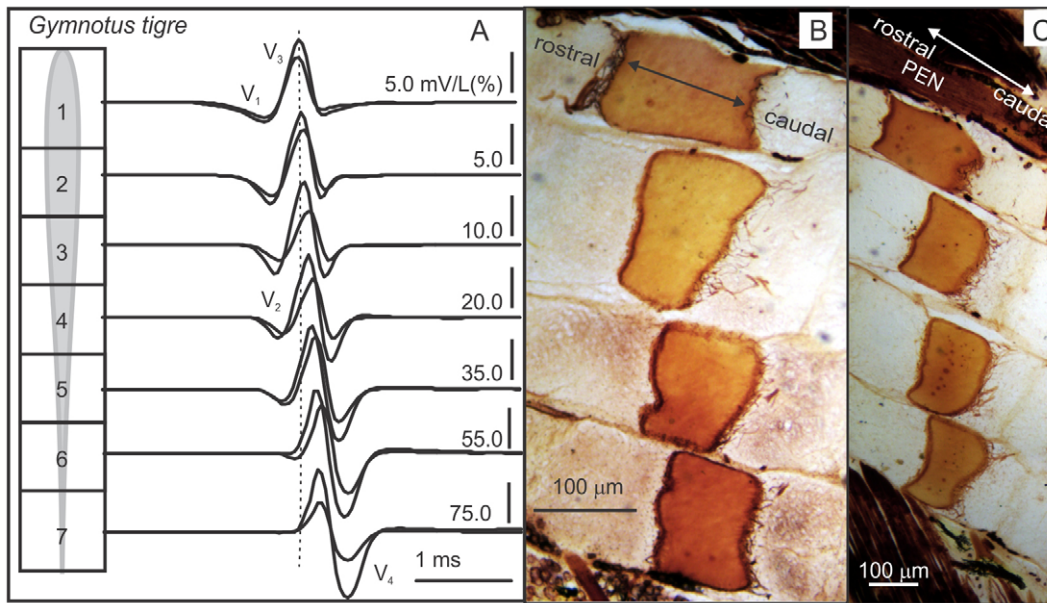

Fig. 9. *Gymnotus tigre*. (A) Spatiotemporal pattern of EMF recorded by the air gap method in two specimens. Five wave components can be observed ( $V_1$ – $V_5$ ). The EMF grows exponentially [ $V_3=0.03+3.16\times\exp(3.85x)$ ,  $r^2=0.96$ ,  $V_4=-2.23+1.41\times\exp(4.78x)$ ,  $r^2=0.94$ ;  $N=13$ ]. A vertical dotted line was drawn in order to show the progress of the activation along the EO. (B) Parasagittal sections of Cajal's silver-impregnated material taken from the middle region of the fish's body (gap 4) show double innervations on the caudal and rostral faces of the electrocytes of the dorsal row, and single caudal innervations of the electrocytes in the other three rows. (C) The electrocytes of the tail are innervated only on their caudal faces.

portion of the fish body, where only singly innervated electrocytes are present, consists of a  $V_{3-4-5}$  sequence. Neither in *G. coropinae* nor in *G. javari* was  $V_4$  load dependent, confirming that current flow along the EO in the absence of external load is enough to recruit synchronously the rostral phases of the electrocytes. This sharp and load-independent  $V_4$ , as well as the back activation of some caudal faces at a short delay ( $V_5$ ), indicates the high auto-excitability of the electrocytes *in situ*.

Together, these data suggest that the cephalic expansion of the EO in *G. javari* is functionally equivalent to the cephalic expansion of the EO in *G. coropinae* (Castelló et al., 2009). This expansion may generate a short-range field component, which is particularly strong around the head, where the electroreceptive fovea occurs (Castelló

et al., 2000). Because of the short range and the high resolution of the target electroreceptive mosaic, we have shown in *G. omarorum* (Aguilera et al., 2001) and *G. coropinae* (Rodríguez-Cattáneo et al., 2008; Castelló et al., 2009) that this rostral component of the EOD is likely to carry active electrolocation signals, while the higher voltage electric field generated by the central and tail regions of the body is likely to carry longer-range electrocommunication signals. In fact, concordant with the generality of this hypothesis, analyses of wave duration indicate that *G. javari* is an extreme example. The relatively long duration of head- and abdominal-generated components of the field, restricted to a small region surrounding the head and thus serving foveal electrolocation, contrast with the fast discharge of the rest of the fish body, reaching longer distances and thus serving

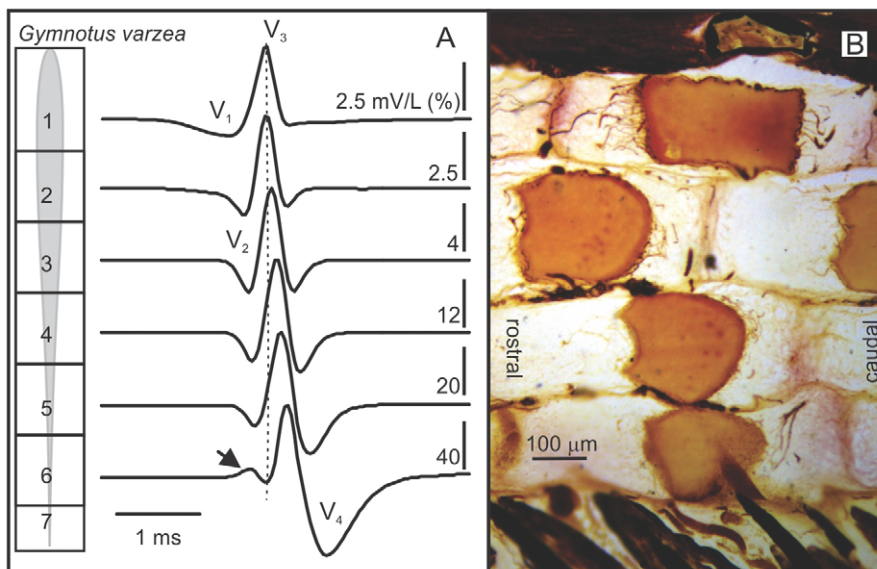

Fig. 10. *Gymnotus varzea*. (A) EMF pattern registered by the air gap method in one specimen. Four wave components can be observed ( $V_1$ – $V_4$ ). In this fish the last (posterior-most) gap was not recorded. A vertical dotted line was drawn in order to show the progress of the activation along the EO. Note the activity of the posterior electromotor nerve at the sixth trace. (B) Parasagittal sections of Cajal's silver-impregnated material taken from the middle region of the fish's body (gap 4) show double innervations on the caudal and rostral faces of the electrocytes of the two dorsal rows, and single caudal innervations of the electrocytes in the other two rows.

communication. All this suggests that in this anatomo-functional group electrolocation and electrocommunication carriers are well separated in two different frequency bands.

Group II comprises species with tetraphasic or pentaphasic EODs generated from the abdominal region to the tip of the tail. This group includes *G. curupira*, *G. n. sp. 'itu'*, *G. omarorum*, *G. tigre* and *G. varzea*. The EOD waveform always starts with a smooth negative component generated at the abdominal region ( $V_{1r}$ ) and is followed by the complex  $V_{2-3-4}$  with a characteristic peak-to-peak ratio and associated delays. In group II, interspecific variation in the head-to-tail recorded waveforms mainly depends on the extent to which the rostral face of the electrocytes is excitable (see above). The ability of action potentials to excite the rostral faces is not an all-or-nothing trait. Some species (*G. curupira* and *G. n. sp. 'itu'*) having large auto-excitability show the largest and sharpest  $V_4$ , and may also show a small late positive component ( $V_5$ ). At the other extreme, *G. omarorum* shows low auto-excitability, which generates a small  $V_4$ . In between these extremes, the remaining species exhibit intermediate amounts of auto-excitability, with consequently intermediate  $V_4$  parameters. We should stress that EO auto-excitability is a phenotypically plastic character that is expected to vary over the course of an individual fish's life because of temperature, acclimation and sexual differentiation (Caputi et al., 1998). Nevertheless, the study of a large number of specimens of *G. n. sp. 'itu'* and *G. omarorum* captured from the Rio de La Plata basin throughout the year (in both the austral winter and summer, and during breeding and non-breeding seasons) indicated that the graded expression of  $V_{4-5}$  may be the only consistent species-specific difference in electrogeneration mechanisms (Rodríguez-Cattáneo and Caputi, 2009).

Group III is characterized by the presence of an early positive slow wave of neural origin at the head-to-tail electric field ( $V_{1ct}$ ) and a large auto-excitability of electrocytes – indicated by the sharpness and load independence of  $V_4$  and the presence of  $V_5$ . This group includes *G. sp. 'carapo PE'*, *G. carapo SU* and *G. sylvius*.  $V_{1ct}$  could be explained by the presence of a large posterior

electromotor nerve whose synchronic activation occurs at the same time as  $V_{1r}$ . Three arguments favor this interpretation: (1) the coincident timing of  $V_{1ct}$  with the activation timing of the nerve observed as a minor deflection in the caudal gap recordings in all species; (2) the coincidence of the location of the electric source of  $V_{1ct}$  with the site where the nerve reaches its largest diameter; and (3) the resistance to curare in *G. sylvius* (A.A.C., P.A. and A.R.-C., unpublished).

The sharpness of  $V_4$  and the presence of  $V_5$  is generally associated with greater EO auto-excitability, as previously described (Rodríguez-Cattáneo and Caputi, 2009). In fact, curarization abolishes  $V_4$  and  $V_5$  in all group III species tested, including *G. sp. 'carapo PE'*, *G. carapo SU* and *G. sylvius*, indicating that these components are the consequence of the auto-excitability of the EO. As expected for very excitable electrogenic tissue,  $V_4$  does not depend on load in species belonging to group III.

Group IV currently comprises a single species, *G. obscurus* [first discovered in the Brazilian Amazon (Crampton et al., 2005)], in which the EOD begins with the main positive wave ( $V_3$ ) and in which a preceding  $V_2$  phase is absent. In addition to exhibiting a quasi-monophasic EOD, the single specimen of *G. obscurus* available for study exhibited three distinctive features: (1) the late negative peak occurs at the tail region and its electromotive force is highly dependent of the amount of longitudinal current associated with  $V_3$ . (2) In the EO sample taken from this species we did not see rostral innervations in any of the electrocytes observed. (3) According to Lovejoy et al. (Lovejoy et al., 2010), this type of EOD is derived from an ancestral multiphasic EOD state, implying loss of synapses on the rostral electrocyte faces, and a reduction of electrocyte excitability. Of the 37 species of *Gymnotus* described to date, only two other species, *G. cylindricus* and *G. maculosus* were known to generate a positive peak ( $V_3$ ) followed by a very low-amplitude negative component (Kirschbaum, 1995). Similarly to our results in *G. obscurus*, the anatomical study of a region of the EO in those specimens failed

Table 2. The role of five anatomo-functional factors in determining interspecific signal diversity in *Gymnotus*

| Functional group | Species                      | Cellular level                                                                                                                          |                   |                                     | Organismal level                                                                                    |                     |
|------------------|------------------------------|-----------------------------------------------------------------------------------------------------------------------------------------|-------------------|-------------------------------------|-----------------------------------------------------------------------------------------------------|---------------------|
|                  |                              | Innervation pattern of the electrocyte                                                                                                  | Auto-excitability | Neurally generated components       | Distribution of electrocyte types                                                                   | Electrocyte density |
| I                | <i>G. coropinae</i>          | Doubly innervated electrocytes generating $V_2$ - $V_3$ pattern                                                                         | High              | Not visible at the head to tail EOD | Four clearly distinct regions of EO (one in particular is extended to the head below the cleithrum) | Low                 |
|                  | <i>G. javari</i>             |                                                                                                                                         |                   |                                     |                                                                                                     |                     |
| II               | <i>G. curupira</i>           | Doubly innervated electrocytes generating $V_1$ - $V_3$ pattern at the abdominal region and $V_2$ - $V_3$ pattern at the central region | Intermediate      | Not visible at the head to tail EOD | Three clearly distinct regions of EO                                                                | High                |
|                  | <i>G. n. sp. 'itu'</i>       |                                                                                                                                         | High              |                                     |                                                                                                     |                     |
|                  | <i>G. omarorum</i>           |                                                                                                                                         | Low               |                                     |                                                                                                     |                     |
|                  | <i>G. tigre</i>              |                                                                                                                                         | High              |                                     |                                                                                                     |                     |
|                  | <i>G. varzea</i>             |                                                                                                                                         | Intermediate      |                                     |                                                                                                     |                     |
| III              | <i>G. n. sp. 'carapo PE'</i> | Doubly innervated electrocytes generating $V_1$ - $V_3$ pattern at the abdominal region and $V_2$ - $V_3$ pattern at the central region | High              | Visible at the head to tail EOD     | Three clearly distinct regions of EO                                                                | High                |
|                  | <i>G. carapo SU</i>          |                                                                                                                                         |                   |                                     |                                                                                                     |                     |
|                  | <i>G. sylvius</i>            |                                                                                                                                         |                   |                                     |                                                                                                     |                     |
| IV               | <i>G. obscurus</i>           | Singly innervated electrocytes                                                                                                          | Very low          | Not visible at the head to tail EOD | ?                                                                                                   | ?                   |

EO, electric organ; EOD, electric organ discharge.

to show doubly innervated electrocytes (Kirschbaum, 1995). Nonetheless, confirming the absolute lack of doubly innervated electrocytes in the three species is required to affirm that *G. cylindricus* and *G. maculosus* belong to the same functional group as *G. obscurus*.

#### Phylogenetic distributions of the four functional groups

The two species that we assigned to functional group I, *G. coropinae* and *G. javari*, belong to the G1 clade of Lovejoy et al. (Lovejoy et al., 2010). Other members of this clade are also known to exhibit similar EODs with high peak power frequencies (typically >1.8 kHz). These species are also predicted to exhibit the same rostral extension of the EO, and auto-excitability at the caudal region. These characteristics are fundamentally different from other species of *Gymnotus* that we examined, and match the phylogenetic position of G1 species, as sister taxon to all remaining *Gymnotus* species in a deep evolutionary divergence.

All members of functional group II belong to the *G. carapo* clade of Lovejoy et al. (Lovejoy et al., 2010) (Lovejoy personal communication for *G. omarorum* and *G. n. sp. 'itu'*). Likewise, all members of functional group III also belongs to the *G. carapo* species clade (Lovejoy et al., 2010) (N. R. Lovejoy, personal communication for *G. sylvius* and *G. carapo* SU), within a complex of species that are very closely related to *G. carapo* SU. The single member of functional group IV, *G. obscurus*, also belongs to the *G. carapo* clade of Lovejoy et al. (Lovejoy et al., 2010).

These patterns indicate that all species in the G1 clade of Lovejoy et al. (Lovejoy et al., 2010) share a common functional EOD pattern, that of group I. In contrast, there is a considerable diversity of waveform generation within the *G. carapo* clade, corresponding to functional groups II, III and IV. In most cases this diversity is the consequence of the presence or absence, or relative amplitude, of low-amplitude EOD components. *Gymnotus obscurus*, with its unusual group IV EOD pattern, is well nested within the *G. carapo* clade, indicating that radical modifications of EOD generation can evolve as a derived condition within this group (Lovejoy et al., 2010). Lovejoy et al.'s (Lovejoy et al., 2010) phylogeny also contains a third, 'G2 clade' comprising *Gymnotus cataniapo*, *Gymnotus pedanopterus* and *Gymnotus cf. anguillaris*. We do not yet have complete data sets for the EOD generation in any species belonging to the G2 clade, and this represents an important direction for future research.

#### The central EOD and the co-evolution of neural and peripheral mechanisms of electrogenesis

The central regions of the body of *Gymnotus* exhibit a pattern generated by the successive neural activation of rostral and caudal faces ( $V_2$ – $V_3$ ), and also by the subsequent activation of rostral faces by the action potentials arising in the caudal faces ( $V_4$ ). The intermediate values of EMF and internal resistance of the central region of the fish's body indicate that the waveform generated here contributes to the far-field waveform much more than waveforms generated in the rostral and caudal portions of the body (Caputi and Budelli, 1995). The interval  $V_2$ – $V_3$  is a neurally determined delay. We have so far confirmed this feature using partial curarization (Rodríguez-Cattáneo and Caputi, 2009). In contrast, the interval  $V_3$ – $V_4$  is only dependent on the electrocyte excitability, as  $V_4$  is generated by action potentials firing at the non-innervated faces when the action currents causing  $V_3$  depolarize them above the critical firing level. We have postulated that the co-evolution of neural and peripheral mechanisms is responsible for the timing of the main sequence  $V_{3,4-5}$  (Castelló et al., 2009). Here we confirmed

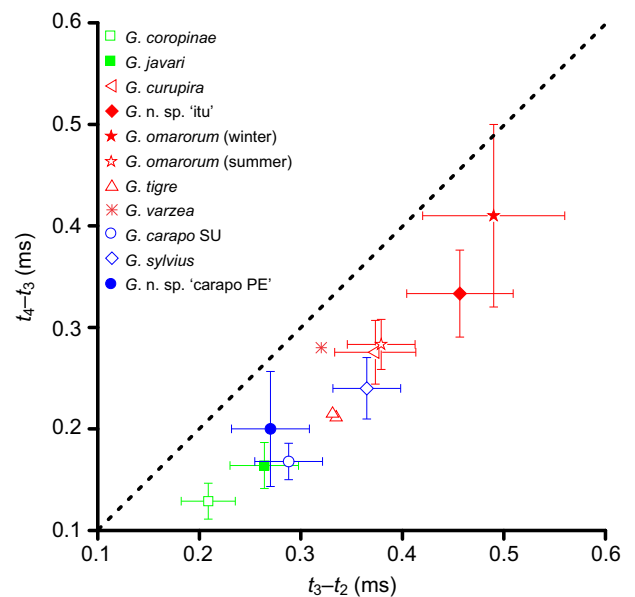

Fig. 11. Co-evolution of neural and myogenic mechanisms of wave coordination in *Gymnotus*. The means of the delays between  $V_2$  and  $V_3$  ( $t_2-t_1$ ) were plotted against the means of the delays between  $V_3$  and  $V_4$  ( $t_3-t_2$ ) for different species. Error bars indicate  $\pm$ s.d. Data were obtained from the center region of the fish's body in all cases (gap 4 in this study). The place of capture, numbers of specimens and the range of temperature ( $T$ ) of the recordings included here are: *G. carapo* SU, Suriname,  $N=4$ ,  $T=20-25^\circ\text{C}$  (Rodríguez-Cattáneo et al., 2008); *G. n. sp. 'carapo PE'*, Peru,  $N=4$ ,  $T=25-30^\circ\text{C}$ ; *G. coropinae*, Suriname,  $N=10$ ,  $T=20-25^\circ\text{C}$  (Rodríguez-Cattáneo et al., 2008); *G. curupira*, Peru,  $N=8$ ,  $T=25-30^\circ\text{C}$ ; *G. n. sp. 'itu'*, Argentina, Paraná river,  $N=12$ ,  $T=20-25^\circ\text{C}$  (Rodríguez-Cattáneo and Caputi, 2009); *G. javari*, Peru,  $N=7$ ,  $T=25-30^\circ\text{C}$ ; *G. sylvius*, Argentina, Paraná river,  $N=8$ ,  $T=20-25^\circ\text{C}$  (A.R.-C. and A.A.C., unpublished); *G. omarorum*, Uruguay, Laguna del Cisne, summer season,  $N=10$ ,  $T=25-30^\circ\text{C}$  (A.R.-C. and A.A.C., unpublished); *G. omarorum*, Uruguay, Laguna del Cisne, winter season,  $N=8$ ,  $T=20-25^\circ\text{C}$  (Caputi et al., 1993); *G. tigre*, Peru,  $N=2$ ,  $T=25-30^\circ\text{C}$ ; *G. varzea*, Peru,  $N=1$ ,  $T=25-30^\circ\text{C}$ .

this hypothesis by including an additional six multiphasic species. The delay  $V_3$ – $V_4$  (i.e. a peripherally determined sequence) follows an increasing function of the delay  $V_2$ – $V_3$  (a neurally determined sequence; Fig. 11). Interestingly, in this plot one can identify regions corresponding to the position of each group.

The matching of the timing of centrally and peripherally determined temporal organization of the EOD raises the question of how electroreceptor tuning matches the peak power frequency. Although extensive data are available on matching receptor tuning curves with local EODs (Bastian, 1976; Bastian, 1977; Watson and Bastian, 1979; Yager and Hopkins, 1993), matching across species is still lacking and should be addressed by future research.

In addition, one might speculate on the mechanisms needed to implement such a match. Changes of the  $V_2$ – $V_3$  interval require changes in the presynaptic timing of the electromotor fibers. This can be achieved by changes in channel repertoire, distance between Ranvier nodes and/or fiber thickness (determining conduction velocity) or fiber lengths. In contrast, changes in electrocyte responsiveness ( $V_3$ – $V_4$ ) are likely dependent on channel repertoire or electrocyte geometry. Parsimony may favor the hypothesis that a species-specific structural change of a membrane channel (or a group of channels) is the basis of this mechanism.

This matching of the timing of neurally and peripherally determined inter-component intervals is important for sharpening

the peak power frequency of the ‘communication carrier’ characteristic of each species (Rodríguez-Cattáneo et al., 2008). The central region is the most important region expressed in the head-to-tail EOD waveform, as well as being the EOD waveform ‘seen’ by conspecifics, which suggests that the frequency range of the power spectra may be a major important EOD feature for conspecific recognition (Hopkins, 1976) or for predator avoidance (Stoddard, 1999). Nonetheless, Crampton et al. (Crampton et al., 2011) document cases of ecologically co-occurring species of *Gymnotus* that exhibit overlapping peak power spectral properties among mature adults, suggesting that species recognition may involve additional cues, such as the temporal properties of the head-to-tail EOD waveform (or parts of the waveform).

### Conclusions

Present evidence from 11 species supports the notion that EOD waveform diversification in *Gymnotus* involves a combination of different anatomic-functional factors, which we summarize below in two categories: first, those that are cell-based, and second, those that act at the organismal level. In this study we identified the role of these factors in determining waveform diversity and identified four anatomic-functional groups (Table 2). The early divergence between species in the G1 clade and other *Gymnotus* lineages is supported by strong differences in EO organization, in which the presence of a rostral expansion of the EO is characteristic of species belonging to the G1 clade (*sensu* Lovejoy et al., 2010). Finally, the neural coordination mechanisms determining the wave timing are important for determining interspecific variation in the peak power frequency of the far-field signals, which would not be possible if the electrocyte responsiveness did not match the difference in neural volley delays. The strong correlation between the neutrally ( $V_2$ – $V_3$ ) and the myogenically ( $V_3$ – $V_4$ ) determined intervals among all species studied to date suggests a hitherto unseen co-evolution of neural and myogenic mechanisms, and supports the presence of a peak frequency in the power spectral density of the emitted signals.

### LIST OF SYMBOLS AND ABBREVIATIONS

|           |                                                                            |
|-----------|----------------------------------------------------------------------------|
| EMF       | electromotive force                                                        |
| EO        | electric organ                                                             |
| EOD       | electric organ discharge                                                   |
| htEOD     | head-to-tail EOD-associated electric field                                 |
| <i>I</i>  | current                                                                    |
| <i>t</i>  | time                                                                       |
| TL        | total length                                                               |
| $V_{1ct}$ | positive slow component with generator in central-tail regions of the fish |
| $V_{1r}$  | first slow negative component with generator in rostral region of the fish |
| $V_2$     | negative component just before $V_3$                                       |
| $V_3$     | main positive component                                                    |
| $V_4$     | negative component just after $V_3$                                        |
| $V_5$     | positive component just after $V_3$                                        |

### ACKNOWLEDGEMENTS

We thank the following, whose collaboration made possible the Amazonian study: Dr. Hernan Ortega (Departamento de Ictiología, Museo de Historia Natural de la Universidad Nacional Mayor de San Marcos) for graciously hosting this research expedition and organizing field permits; Euridice Honorio and Edwin Correa Verdi (Instituto de Investigaciones de la Amazonia Peruana for use of the Jenaro Herrera Research Center); Dr Jorge L. Marapara Del Águila and his collaborators (Universidad de la Amazonia Peruana, Iquitos, Perú) for graciously providing laboratory space and fundamental support for the electrophysiological recordings and extraction of the anatomical samples; Erika Vanessa Correa and Maria Isabel Aldea Guevara for coordinating and assisting with field research and logistics; Joseph Waddell, Jeffrey Lambert and John Stark from the University of Central Florida, and Edinson Emiliano Irapica Curinuqui, Rider Souza Chota, Nolortegui Parana Canelao, Edinson Irapica Huanquiri and Hugo Irapica Huanquiri for field

and laboratory assistance; and Alejandra Pastorino for technical processing of histological samples. We thank N. Lovejoy for fruitful discussions.

### AUTHOR CONTRIBUTIONS

A.A.C. and W.G.R.C. contributed to the conception and design of the long-term study; A.R.-C. and A.A.C. executed the anatomical techniques; all authors executed the physiological techniques and interpreted the findings of the study; A.R.-C. and A.A.C. drafted the article; and A.A.C., W.G.R.C., P.A. and A.R.-C. were involved in revision of the article.

### COMPETING INTERESTS

No competing interests declared.

### FUNDING

This research was funded by the National Science Foundation [grant DEB-0614334 to W.G.R.C. (PI) and J. Albert, N. Lovejoy and A.A.C. (co-PIs)]; the European Commission ICT-FET Proactive Initiative ‘Embodied Intelligence’ [project acronym: ANGELS; grant no. 231845]; the Agencia Nacional de Investigación e Innovación of Uruguay [FCE 655, SNB and SNI]; and PEDECIBA Uruguay.

### REFERENCES

- Aguilera, P. A., Castelló, M. E. and Caputi, A. A. (2001). Electroreception in *Gymnotus carapo*: differences between self-generated and conspecific-generated signal carriers. *J. Exp. Biol.* **204**, 185–198.
- Albert, J. S. and Crampton, W. G. R. (2003). Seven new species of the neotropical electric fish *Gymnotus* (Teleostei: Gymnotiformes) with a redescription of *G. carapo* (Linnaeus). *Zootaxa* **287**, 1–54.
- Bastian, J. (1976). Frequency response characteristics of electroreceptors in weakly electric fish (*Gymnotidae*) with a pulse discharge. *J. Comp. Physiol.* **112**, 165–180.
- Bastian, J. (1977). Variations in the frequency response of electroreceptors dependent on receptors location in weakly electric fish (*Gymnotidae*) with a pulse discharge. *J. Comp. Physiol.* **121**, 53–64.
- Bell, C. C., Bradbury, J. and Russell, C. J. (1976). The electric organ of a mormyrid as a current and voltage source. *J. Comp. Physiol.* **110**, 65–88.
- Bennett, M. V. L. (1971). Electric organs. In *Fish Physiology*, Vol. 5 (ed. W. S. Hoar and D. J. Randall), pp. 347–491. London: Academic Press.
- Bennett, M. V. L. and Grundfest, H. (1959). Electrophysiology of electric organ in *Gymnotus carapo*. *J. Gen. Physiol.* **42**, 1067–1104.
- Black-Cleworth, P. (1970). The role of electrical discharges in the non-reproductive social behaviour of *Gymnotus carapo* (Gymnotidae, Pisces). *Anim. Behav.* **3**, 1–77.
- Caputi, A. A. (1994). Integración de la descarga del órgano eléctrico en gymnotídeos de pulso. PhD dissertation, Facultad de Ciencias, Universidad de la República, Montevideo, Uruguay.
- Caputi, A. A. (1999). The electric organ discharge of pulse gymnotiforms: the transformation of a simple impulse into a complex spatio-temporal electromotor pattern. *J. Exp. Biol.* **202**, 1229–1241.
- Caputi, A. A. (2011). Electric organs. In *Encyclopedia of Fish Physiology* (ed. A. Farrell), pp. 387–397. London: Academic Press.
- Caputi, A. A. and Aguilera, P. (1996). A field potential analysis of the electromotor system in *Gymnotus carapo*. *J. Comp. Physiol. A* **179**, 827–835.
- Caputi, A. A. and Budelli, R. (1995). The electric image in weakly electric fish: I. A data-based model of waveform generation in *Gymnotus carapo*. *J. Comput. Neurosci.* **2**, 131–147.
- Caputi, A. A. and Budelli, R. (2006). Peripheral electrosensory imaging by weakly electric fish. *J. Comp. Physiol. A* **192**, 587–600.
- Caputi, A. A. and Trujillo-Cenóz, O. (1994). The spinal cord of *Gymnotus carapo*: the electromotoneurons and their projection patterns. *Brain Behav. Evol.* **44**, 166–174.
- Caputi, A. A., Macadar, O. and Trujillo-Cenóz, O. (1989). Waveform generation in *Gymnotus carapo*. III. Analysis of the fish body as an electric source. *J. Comp. Physiol. A* **165**, 361–370.
- Caputi, A. A., Silva, A. and Macadar, O. (1993). Electric organ activation in *Gymnotus carapo*: spinal and peripheral mechanisms. *J. Comp. Physiol. A* **173**, 227–232.
- Caputi, A. A., Macadar, O. and Trujillo-Cenóz, O. (1994). Waveform generation in *Rhamphycichthys rostratus* (L.) (Teleostei, Gymnotiformes). The electric organ and its spatiotemporal activation pattern. *J. Comp. Physiol. A* **174**, 633–642.
- Caputi, A. A., Silva, A. and Macadar, O. (1998). The electric organ discharge of *Brachyhyppopomus pinnicaudatus*. The effect of environmental variables on waveform generation in *Brachyhyppopomus pinnicaudatus*. *Brain Behav. Evol.* **52**, 148–158.
- Caputi, A. A., Carlson, B. and Macadar, O. (2005). Electric organs and their control. In *Electroreception (Springer Handbook of Auditory Research)* (ed. T. H. Bullock, C. D. Hopkins, A. N. Popper, R. R. Fay), pp. 410–451. New York: Springer.
- Castelló, M. E., Aguilera, P. A., Trujillo-Cenóz, O. and Caputi, A. A. (2000). Electroreception in *Gymnotus carapo*: pre-receptor processing and the distribution of electroreceptor types. *J. Exp. Biol.* **203**, 3279–3287.
- Castelló, M. E., Rodríguez-Cattáneo, A., Aguilera, P. A., Iribarne, L., Pereira, A. C. and Caputi, A. A. (2009). Waveform generation in the weakly electric fish *Gymnotus coropinae* (Hoedeman): the electric organ and the electric organ discharge. *J. Exp. Biol.* **212**, 1351–1364.
- Cox, R. T. and Coates, C. W. (1938). Electrical characteristics of the electric tissue of the electric eel, *Electrophorus electricus* (Linnaeus). *Zoologica* **23**, 203–212.
- Crampton, W. G. R. (2011). An ecological perspective on diversity and distributions. In *Historical Biogeography of Neotropical Freshwater Fishes* (ed. J. S. Albert and R. E. Reis), pp. 165–189. Berkeley, CA: University of California Press.

- Crampton, W. G. R. and Albert, J. S.** (2006). Evolution of electric signal diversity in gymnotiform fishes. I. Phylogenetic systematics, ecology and biogeography. In *Communication in Fishes* (ed. F. Ladich, S. P. Collin, P. Moller and B. G. Kapoor), pp. 647-696; 718-731. Enfield, NH: Science Publishers.
- Crampton, W. G. R., Thorsen, D. H. and Albert, J. S.** (2005). Three new species from a diverse, sympatric assemblage of the electric fish *Gymnotus* (Gymnotiformes, Gymnotidae) in the lowland Amazon basin, with notes on ecology. *Copeia* **2005**, 82-99.
- Crampton, W. G. R., Davis, J. K., Lovejoy, N. R. and Pensky, M.** (2008). Multivariate classification of animal communication signals: a simulation-based comparison of alternative signal processing procedures using electric fishes. *J. Physiol. Paris* **102**, 304-321.
- Crampton, W. G. R., Lovejoy, N. R. and Waddell, J. C.** (2011). Reproductive character displacement and signal ontogeny in a sympatric assemblage of electric fish. *Evolution* **65**, 1650-1666.
- Franchina, C. R. and Stoddard, P. K.** (1998). Plasticity of the electric organ discharge waveform of the electric fish *Brachyhypopomus pinnicaudatus*. I. Quantification of day-night changes. *J. Comp. Physiol. A* **183**, 759-768.
- Hopkins, C. D.** (1976). Stimulus filtering and electroreception: tuberous electroreceptors in three species of gymnotoid fish. *J. Comp. Physiol.* **111**, 171-207.
- Kirschbaum, F.** (1995). Discharge types of gymnotiform fishes. In *Electric Fishes: History and Behavior (Fish and Fisheries Series)* (ed. P. Moller), pp. 172-180, 584. London: Chapman & Hall.
- Lissmann, H. W.** (1958). On the function and evolution of electric organ in fish. *J. Exp. Biol.* **35**, 156-191.
- Lorenzo, D., Velluti, J. C. and Macadar, O.** (1988). Electrophysiological properties of abdominal electrocytes in the weakly electric fish *Gymnotus carapo*. *J. Comp. Physiol. A* **162**, 141-144.
- Lorenzo, D., Sierra, F., Silva, A. and Macadar, O.** (1990). Spinal mechanisms of electric organ discharge synchronization in *Gymnotus carapo*. *J. Comp. Physiol. A* **167**, 447-452.
- Lorenzo, D., Sierra, F., Silva, A. and Macadar, O.** (1993). Spatial distribution of the medullary command signal within the electric organ of *Gymnotus carapo*. *J. Comp. Physiol. A* **173**, 233-238.
- Lovejoy, N. R., Lester, K., Crampton, W. G. R., Marques, F. P. L. and Albert, J. S.** (2010). Phylogeny, biogeography, and electric signal evolution of neotropical knifefishes of the genus *Gymnotus* (Osteichthyes: Gymnotidae). *Mol. Phylogenet. Evol.* **54**, 278-290.
- Macadar, O.** (1993). Motor control of waveform generation in *Gymnotus carapo*. *J. Comp. Physiol. A* **173**, 728-729.
- Macadar, O., Lorenzo, D. and Velluti, J. C.** (1989). Waveform generation of the electric organ discharge in *Gymnotus carapo*. II. Electrophysiological properties of single electrocytes. *J. Comp. Physiol. A* **165**, 353-360.
- McGregor, P. K. and Westby, G. W. M.** (1992). Discrimination of individually characteristic electric organ discharges by a weakly electric fish. *Anim. Behav.* **43**, 977-986.
- Pereira, A. C. and Caputi, A. A.** (2010). Imaging in electrosensory systems. *Interdiscip. Sci.* **2**, 291-307.
- Ramón y Cajal, S. and De Castro, F.** (1933). *Elementos de Técnica Micrográfica del Sistema Nervioso*. Barcelona: Salvat Editores.
- Richer de Forges, M., Crampton, W. G. R. and Albert, J. S.** (2009). A new species of *Gymnotus* (Gymnotiformes, Gymnotidae) from Uruguay: description of a model species in neurophysiological research. *Copeia* **2009**, 538-544.
- Rodríguez-Cattáneo, A.** (2009). Descripción del patrón de la descarga del organo eléctrico en seis especies de *Gymnotus*. MSc thesis, Facultad de Ciencias, Universidad de la Republica, Uruguay.
- Rodríguez-Cattáneo, A. and Caputi, A. A.** (2009). Waveform diversity of electric organ discharges: the role of electric organ auto-excitability in *Gymnotus* spp. *J. Exp. Biol.* **212**, 3478-3489.
- Rodríguez-Cattáneo, A., Pereira, A. C., Aguilera, P. A., Crampton, W. G. R. and Caputi, A. A.** (2008). Species-specific diversity of a fixed motor pattern: the electric organ discharge of *Gymnotus*. *PLoS ONE* **3**, e2038.
- Sierra, F., Lorenzo, D., Macadar, O. and Buño, W.** (1995). N-type Ca<sup>2+</sup> channels mediate transmitter release at the electromotoneuron-electrocyte synapses of the weakly electric fish *Gymnotus carapo*. *Brain Res.* **683**, 215-220.
- Sierra, F., Comas, V., Buño, W. and Macadar, O.** (2005). Sodium-dependent plateau potentials in electrocytes of the electric fish *Gymnotus carapo*. *J. Comp. Physiol. A* **191**, 1-11.
- Stoddard, P. K.** (1999). Predation enhances complexity in the evolution of electric fish signals. *Nature* **400**, 254-256.
- Trujillo-Cenóz, O. and Echagüe, J. A.** (1989). Waveform generation of the electric organ discharge in *Gymnotus carapo*. I. Morphology and innervation of the electric organ. *J. Comp. Physiol. A* **165**, 343-351.
- Trujillo-Cenóz, O., Echagüe, J. A. and Macadar, O.** (1984). Innervation pattern and electric organ discharge waveform in *Gymnotus carapo* (Teleostei; Gymnotiformes). *J. Neurobiol.* **15**, 273-281.
- Watson, D. and Bastian, J.** (1979). Frequency response characteristics of electroreceptors in the weakly electric fish *Gymnotus carapo*. *J. Comp. Physiol.* **134**, 191-202.
- Westby, G. W. M.** (1974). Assessment of the signal value of certain discharge patterns in the electric fish, *Gymnotus carapo*, by means of playback. *J. Comp. Physiol.* **92**, 327-341.
- Yager, D. D. and Hopkins, C. D.** (1993). Directional characteristics of tuberous electroreceptors in the weakly electric fish *Hypopomus* (Gymnotiformes). *J. Comp. Physiol. A* **173**, 401-414.
